# Supplementary material for: Mesoporous ZSM-22 zeolite obtained by desilication: peculiarities associated with crystal morphology and aluminium distribution
Source: Royal Society of Chemistry journal article supplement (doi:10.1039/c0ce00966k), 2011-01-01
Supplement: c0ce00966k.pdf [file c0ce00966k.pdf]

## Electronic Supplementary Information

### Mesoporous ZSM-22 zeolite obtained by desilication: peculiarities associated with crystal morphology and aluminium distribution

Danny Verboekend, André M. Chabaneix, Karine Thomas, Jean-Pierre Gilson,  
and Javier Pérez-Ramírez

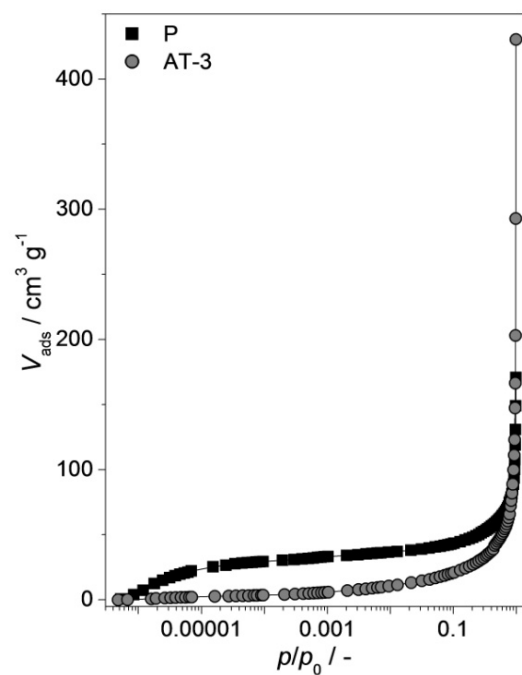

**Figure SI1.** High-resolution low-pressure argon adsorption isotherms of parent and alkaline-treated ZSM-22.

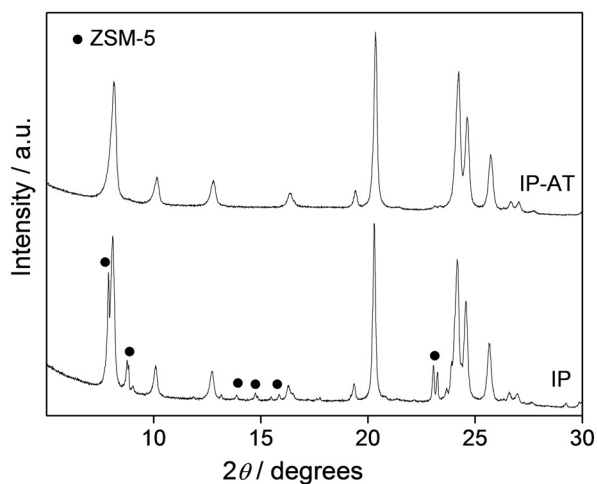

**Figure SI2.** X-ray diffraction patterns of an impure ZSM-22 (IP) and the sample resulting from alkaline treatment (IP-AT) using 0.4 M NaOH, 30 min, and 85°C. The unlabelled peaks belong to the TON diffraction pattern.

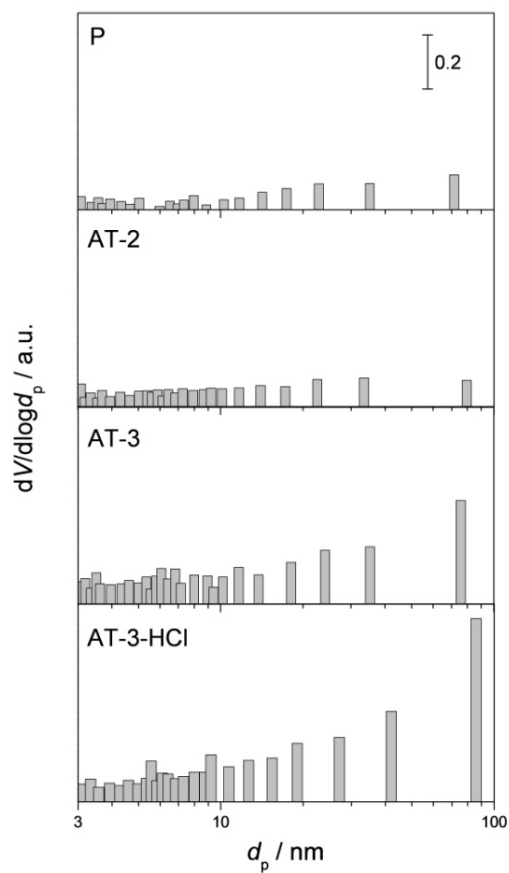

**Figure SI3.** BJH adsorption pore size distributions of parent and alkaline-treated ZSM-22 zeolites derived from the nitrogen isotherms in Figure 4.
